# Supplementary material for: Dual Application of p-Nitrophenol Alkanoate-Based Assay for Soil Selection and Screening of Microbial Strains for Bioplastic Degradation
Source: PubMed Central journal article supplement (PMC11294652; doi:10.4014/jmb.2403.03013), 2024-05-30
Supplement: jmb-34-7-1530-supple.pdf [file jmb-34-7-1530-supple.pdf]

## Supplementary Figure

### Dual Application of *p*-Nitrophenol Alkanoate-Based Assay for Soil Selection and Screening of Microbial Strains for Bioplastic Degradation

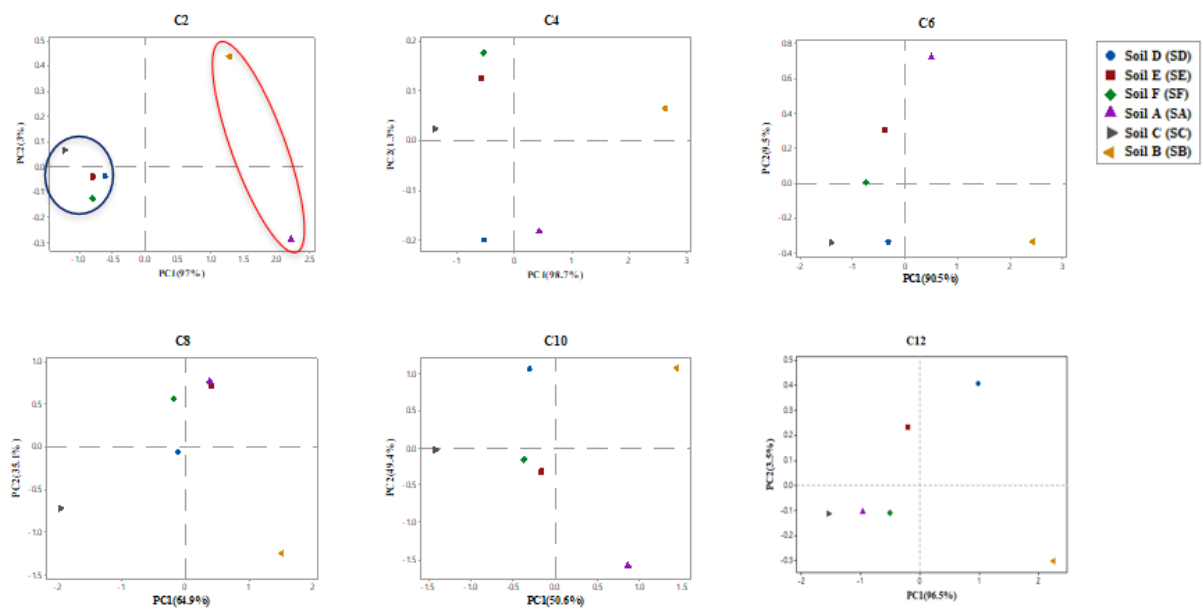

**Fig. S1.** PCA analysis for soil esterase activity test. PCA result for OD value after esterase activity test according to substrates (C2-C12).
